# Supplementary material
Source: Springer Nature journal article supplement (https://www.springermedizin.de/resource/supplementary/12913_2009_1256_MOESM1_ESM.pdf/9527706)

## STEPS

Verbatim transcription

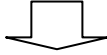

Independent, open line-by-line coding

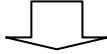

Clustering of common codes (by consensus)

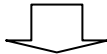

Formation & labeling of categories

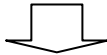

Formation of concepts/subthemes (within group)

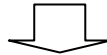

Identification of major themes (across groups)

Constant Comparison

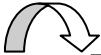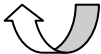

## PROCESS TO ENSURE STUDY RIGOUR

Audit Trail

Data Source Triangulation with moderators' notes & participants' response forms

Primary Author's Reflective Journal

Member Checking with study participants

Peer Checking with independent qualitative researcher

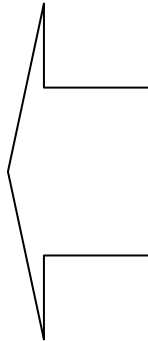

Supplement: MOESM1 [file 9527706]
